# Supplementary material for: CO tolerance of Pt/FeOxcatalyst in both thermal catalytic H2oxidation and electrochemical CO oxidation: the effect of Pt deficit electron state
Source: Royal Society of Chemistry journal article supplement (doi:10.1039/c6cp05289d), 2016-01-01
Supplement: c6cp05289d1.pdf [file c6cp05289d1.pdf]

## **CO-tolerance of Pt/Fe Catalyst in Both Thermal Catalytic H<sub>2</sub> Oxidation and Electrochemical CO Oxidation: the Effect of Pt Deficit Electron State**

Lequan Liu, Feng Zhou, Rajesh Kodiyath, Shigenori Ueda, Hideki Abe, Defa Wang, Youquan Deng and  
Jinhua Ye

### **Catalyst Characterization**

Pt loadings in the catalyst samples were determined with ICP-AES (IRIS Advantage ER/S).

High-resolution transmission electron microscopy (TEM) characterization was performed with a JEOL 2100F operated at 200 kV. Powder X-ray diffraction (XRD) patterns of the products were recorded on an X'Pert PRO diffractometer with Cu-K $\alpha$  radiation. The Brunauer-Emmett-Teller (BET) surface areas were measured via nitrogen physisorption (Gemini-2360; Micromeritics Corp., U.S.A.).

### **Catalyst activity tests**

The active test system was benchmarked with the standard catalyst of 4.4 wt% Au/Fe<sub>2</sub>O<sub>3</sub>-W. In our active test system, the temperature at 50% CO conversion is -30 °C, which is slightly higher than the provided temperature of -37 °C (100 mg, flow rate: 33 ml/min, space velocity (SV): 20000 ml·h<sup>-1</sup>· g<sup>-1</sup>), indicating that our active test system is reliable.

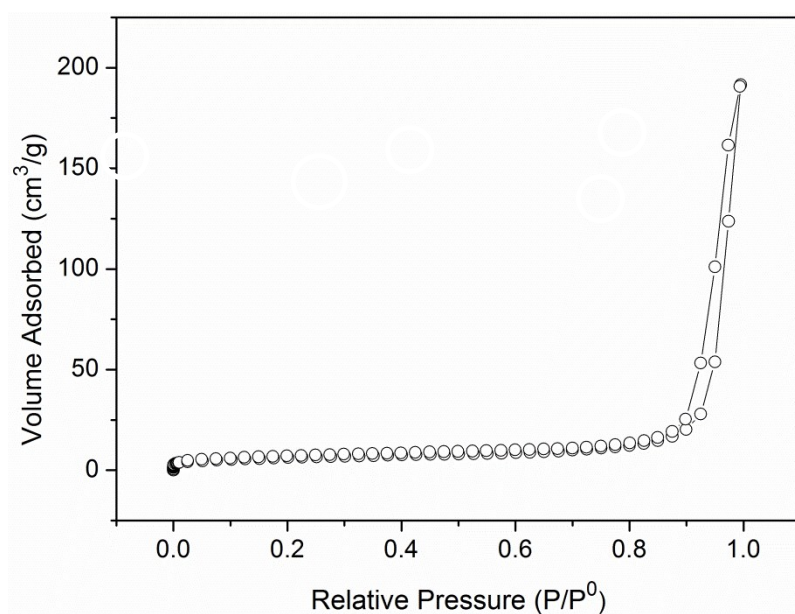

Fig. S1. Nitrogen physisorption isotherms of Pt/Fe catalyst

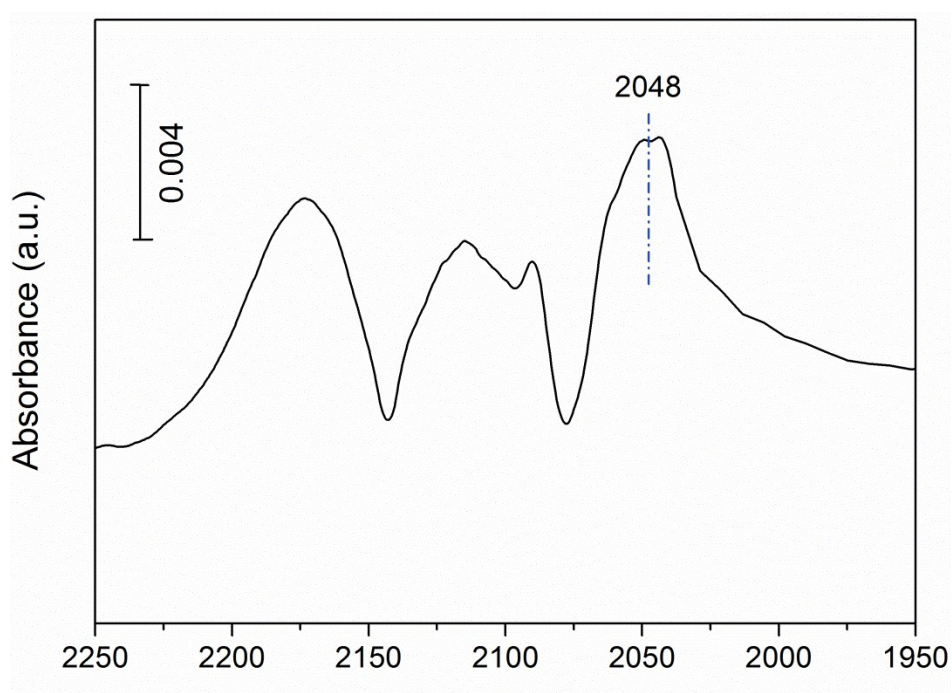

Fig. S2. In-situ DRIFTS spectrum of Pt/Fe catalyst. The sample was first flushed with Ar for 30 min, reduced with 10% H<sub>2</sub> for 1h, exposed to 1% CO for 30 min, followed by purging with Ar for 1 h, and then studied with DRIFT.
